# Supplementary material for: Downregulation of class II phosphoinositide 3-kinase PI3K-C2β delays cell division and potentiates the effect of docetaxel on cancer cell growth
Source: PubMed Central journal article supplement (PMC6873561; doi:10.1186/s13046-019-1472-9), 2019-11-21

a

DMSO

0.5nM Docetaxel

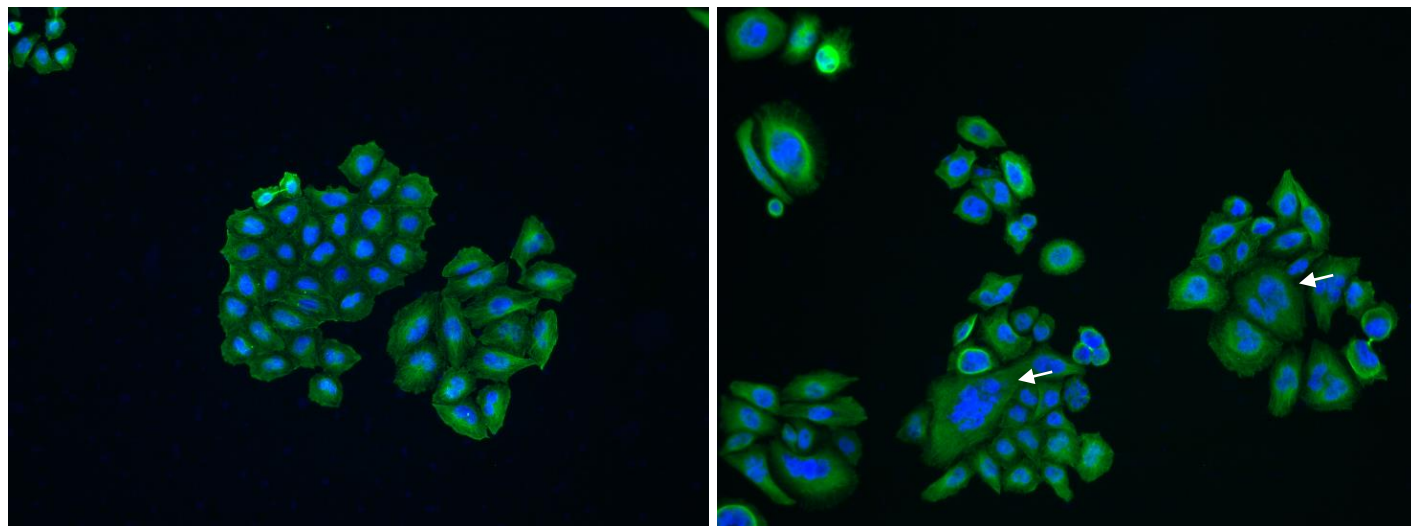

b

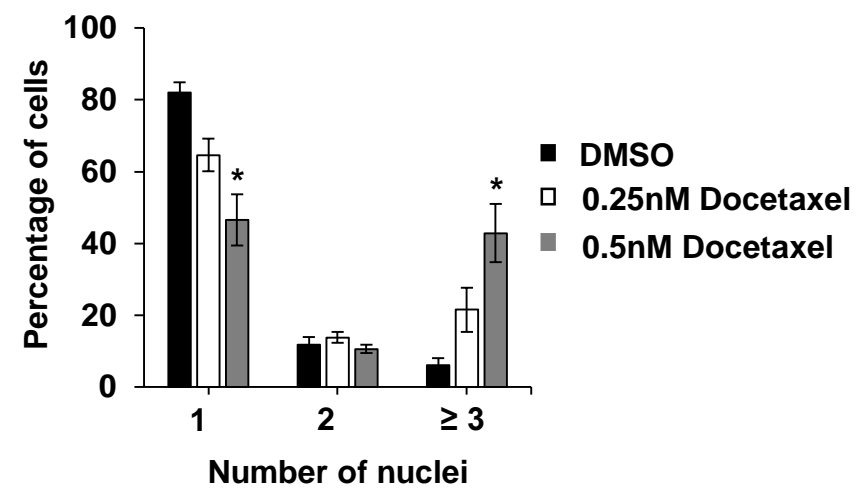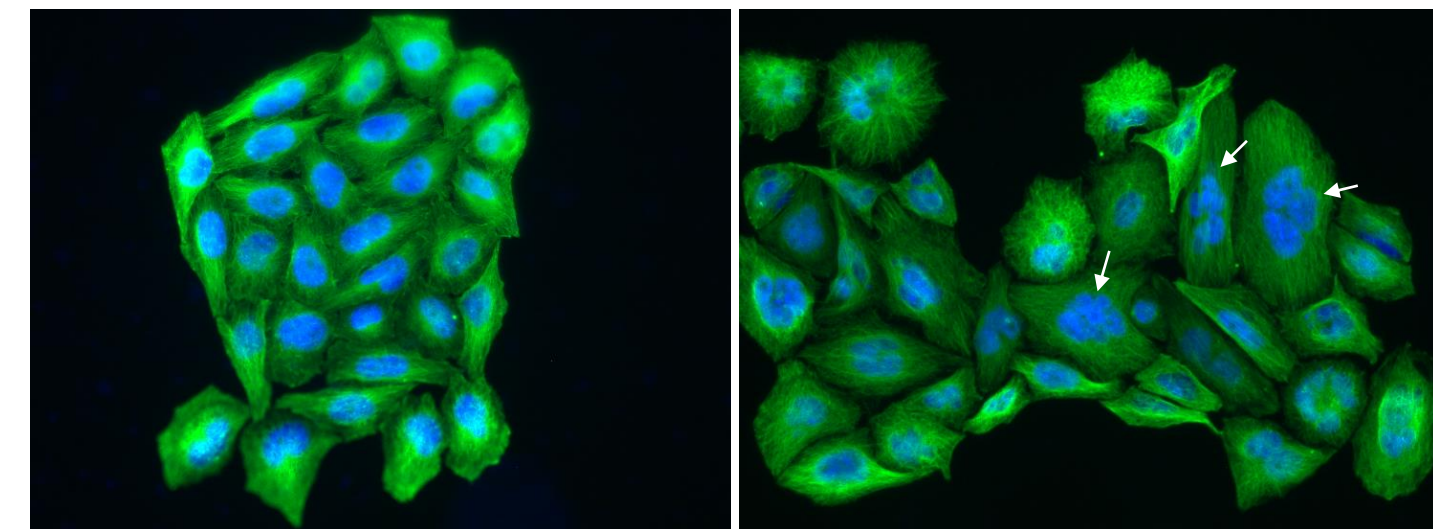

c

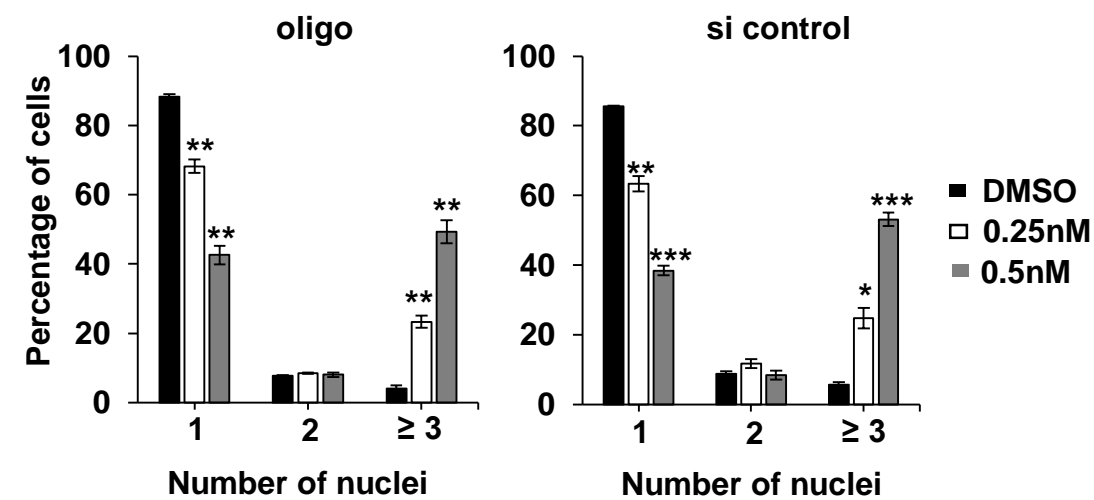

Supplement: 13046_2019_1472_MOESM8_ESM.pdf [file 13046_2019_1472_MOESM8_ESM.pdf]
